# Supplementary material
Source: publisher figshare collection journal article supplement (https://diabetesjournals.figshare.com/ndownloader/files/24054281)

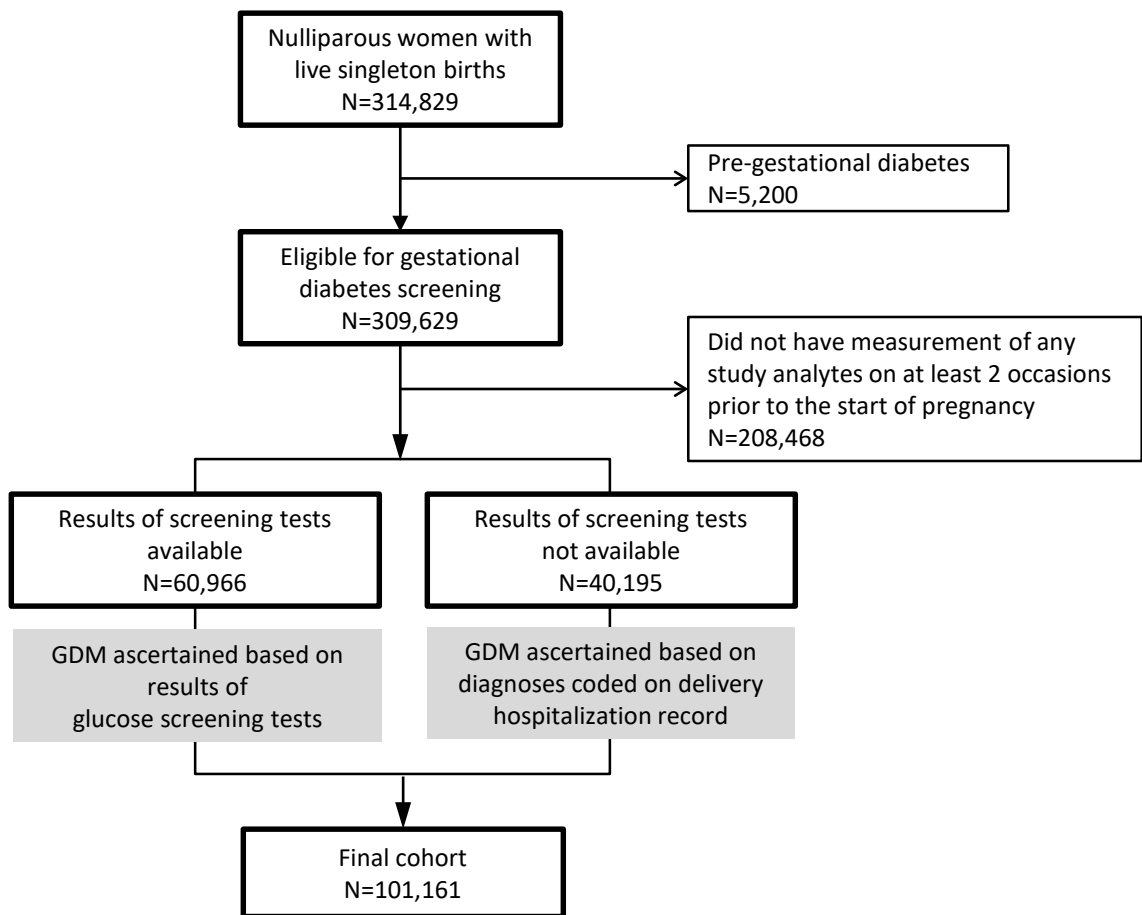

Online Figure 1: Derivation of study population

Supplement: Supplementary file 1 [file 24054281]
